# Supplementary material for: Metformin suppresses triple-negative breast cancer stem cells by targeting KLF5 for degradation
Source: PubMed Central journal article supplement (PMC5396048; doi:10.1038/celldisc.2017.10), 2017-04-18
Supplement: celldisc201710-s1.pdf [file celldisc201710-s1.pdf]

**Supplementary Table S1. siRNA sequences used in this study**

| <b>Targets</b> | <b>Sequences (5' to 3')</b> |
|----------------|-----------------------------|
| PKA $\alpha$   | CAAGGACAACUCAAAACUUA        |
| PKA $\beta$    | AAGAGUUUCUAGCCAAAGCCA       |
| GSK3 $\beta$   | AAGUAAUCCACCUCUGGCUAC       |
| Stat3 1#       | GGGACCUGGUGUGAAUUAU         |
| Stat3 2#       | CCCGGAAAUUUAACAUUCU         |
| Stat3 3#       | GGCCAGCAAAGAAUCACAU         |

**Supplementary Table S2. qPCR primers used in this study**

| <b>Names</b>                  |         | <b>Sequences (5' to 3')</b> |
|-------------------------------|---------|-----------------------------|
| <i>KLF5</i>                   | Forward | ACACCAGACCGCAGCTCCA         |
|                               | Reverse | TCCATTGCTGCTGTCTGATTTGTAG   |
| <i>FGF-BP1</i>                | Forward | TG TTCAGAGGCTGTTTCCTG       |
|                               | Reverse | TTCAGCAGAAAGTTCGTTGC        |
| <i>PKA<math>\alpha</math></i> | Forward | GATGCTGGTGAAACACAAGG        |
|                               | Reverse | TCATTCAGGGTGTGTTTCGAT       |
| <i>PKA<math>\beta</math></i>  | Forward | GGGCTACAATAAGGCAGTGG        |
|                               | Reverse | TGGTTGGTCTGCAAAGAATG        |
| <i>GAPDH</i>                  | Forward | GGTGAAGGTCGGAGTCAACG        |
|                               | Reverse | CAGAGTTAAAAGCAGCCCTGGT      |

## Supplementary Figure Legend

### **Supplementary Figure S1. Metformin suppresses TNBC stem cells, as measured by the ALDH and mammosphere assay**

**A.** The upper panel shows HCC1806 cells that were incubated with DEAB, a specific ALDH inhibitor. The lower panel shows the ALDH-positive CSCs. Metformin significantly decreased the percentage of ALDH-positive CSCs in HCC1806 cells. Representative results from at least three independent experiments are shown.

**B.** Metformin significantly decreased the percentage of ALDH-positive CSCs in HCC1937 cells.

**C.** Metformin inhibited ALDH-positive HCC1806 CSCs in a dose-dependent manner. The cells were treated with 2, 5, 10, 20 or 50 mM metformin for 24 h. The results are shown as bar graphs with the mean  $\pm$  SD, n=3 independent experiments. The statistical significance was determined by student's *t-test*. \*\*, p<0.01.

**D.** Representative pictures of mammosphere from HCC1806 and HCC1937.

**Supplementary Figure S2. Overexpression KLF5 partially rescues the metformin-induced CSC reduction in HCC1937 cells, as measured by an ALDH assay.** The upper panel shows HCC1937 cells that were incubated with DEAB, a specific ALDH inhibitor. The lower panel shows the ALDH-positive CSCs. Representative results from at least three independent experiments are shown.

**Supplementary Figure S3. The PKA-GSK3 $\beta$ -KLF5 axis is not expressed in**

**non-TNBC breast cancer cell lines.** ER-positive (ER+) cell lines: MCF7, T47D and ZR-75-1; HER2-positive (HER2+) cell lines: SK-BR-3 and BT474; and TNBC cell line: HCC1937 were collected. The protein expression levels were detected by WB.

**Supplementary Figure S4. Stat3 knockdown does not downregulate the expression levels of KLF5 in TNBC cell lines.** Three different Stat3 siRNAs efficiently silenced Stat3 expression in HCC1806 and HCC1937 cells; however, the KLF5 protein levels were unchanged. Cells were transfected with siRNAs for 72 h. Stat3, p-Stat3 (Y705) and KLF5 levels were measured by WB.

**Supplementary Figure S5. Glucose starvation decreases the expression of KLF5 and increases the efficacy of metformin in TNBC**

**A.** HCC1937 cells were cultured in glucose (25 mM) or glucose-free medium for 24 h. The WB result was shown.

**B.** HCC1937 cells were cultured for 24 h and were washed at least 3 times by PBS. Following that, the cells were cultured in glucose-25 mM or glucose-5 mM medium. Metformin was added for 24 h and the cells were collected for WB.

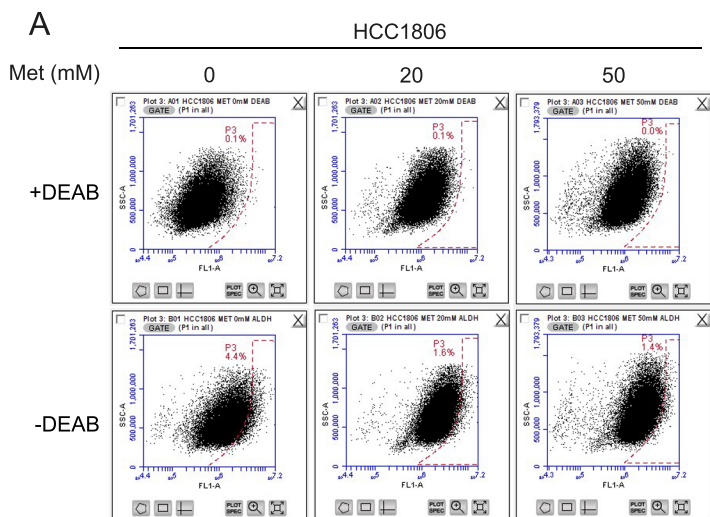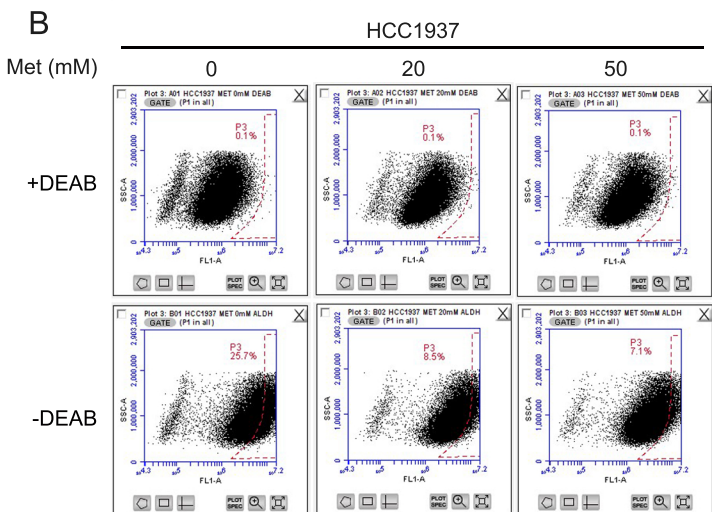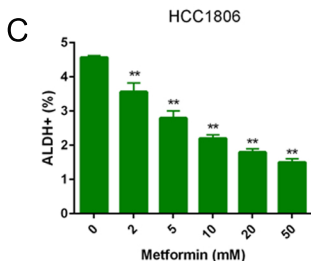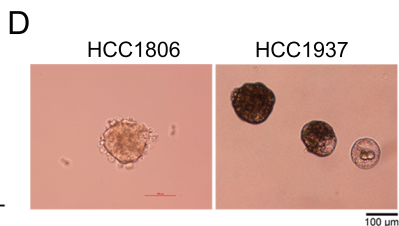

Supplementary Figure S1

HCC1937

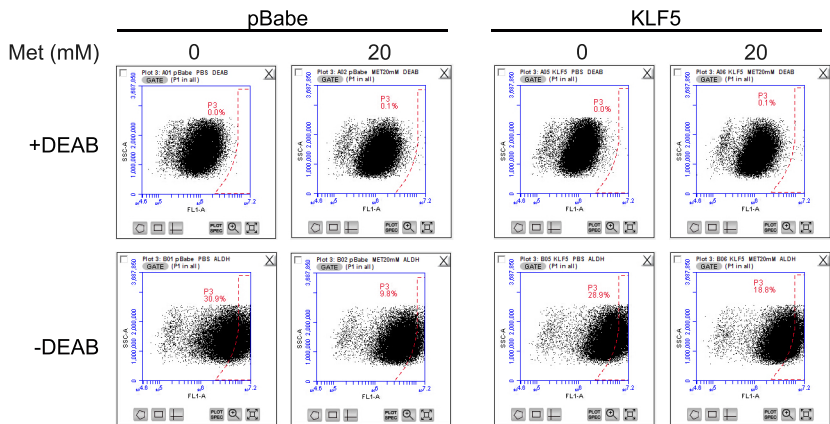

Supplementary Figure S2

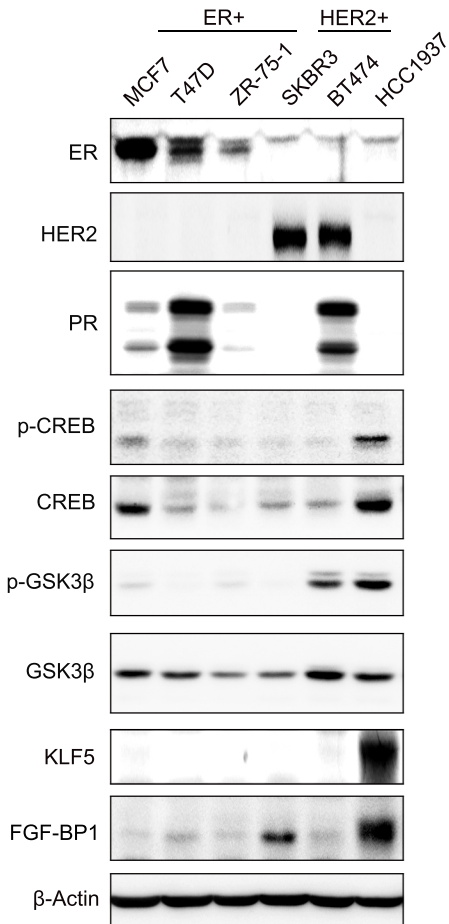

Supplementary Figure S3

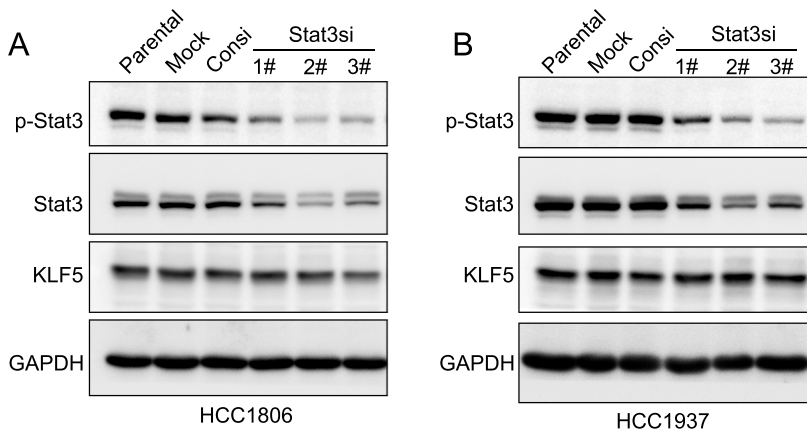

Supplementary Figure S4

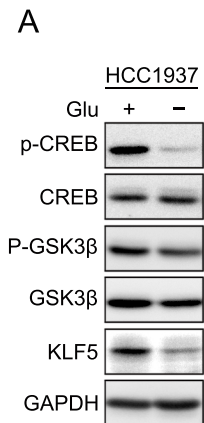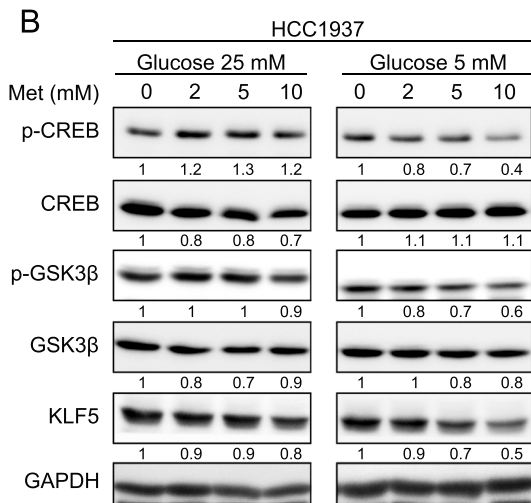

Supplementary Figure S5
